# Supplementary material for: A High-Throughput Immune-Oncology Screen Identifies EGFR Inhibitors as Potent Enhancers of Antigen-Specific Cytotoxic T-lymphocyte Tumor Cell Killing
Source: Oxford University Press journal article supplement (doi:10.1158/2326-6066.cir-18-0193), 2018-09-21
Supplement: 23266066cir180193-sup-199199_2_supp_5008094_pzjggc.xlsx [file 23266066cir180193-sup-199199_2_supp_5008094_pzjggc.xlsx]

## Sheet: Sheet1
plate ID	name	alternative name	target
HMSL-10001	Seliciclib	(R)-Roscovitine; CYC202	CDK2
HMSL-10002	ALW-II-38-3		DDR1
HMSL-10003	ALW-II-49-7		DDR1
HMSL-10004	AT-7519		CDK9
HMSL-10005	Tivozanib	AV-951	VEGFR-2
HMSL-10006	AZD7762		CHK1
HMSL-10007	AZD8055		mTOR
HMSL-10008	Sorafenib	BAY-439006	BRAF
HMSL-10009	CP466722		ATM
HMSL-10010	CP724714		erbB-2
HMSL-10011	Alvocidib	Flavopiridol; HMR-1275; L868275	CDK1
HMSL-10012	GSK429286A		ROCK1
HMSL-10013	GSK461364	GSK461364A	PLK1
HMSL-10014	GW843682X	GW843682	PLK1
HMSL-10015	HG-5-113-01		LOK
HMSL-10016	HG-5-88-01		EGFR
HMSL-10017	HG-6-64-01	KIN001-206	ABL1
HMSL-10018	Neratinib	HKI-272	erbB-2
HMSL-10019	JW-7-24-1		LCK
HMSL-10020	Dasatinib	BMS-354825; Sprycel	ABL1
HMSL-10021	Tozasertib	VX680; MK-0457	Aurora kinase A
HMSL-10022	GNF2		ABL1
HMSL-10023	Imatinib	Gleevec; Glivec; CGP-57148B; STI-571	ABL1
HMSL-10024	NVP-TAE684	TAE-684	ALK
HMSL-10025	CGP60474	MLS000911536; SMR000463552	CDK1
HMSL-10026	PD173074		FGFR1
HMSL-10027	Crizotinib	PF02341066	c-Met
HMSL-10028	BMS345541		IKKB
HMSL-10029	LY2090314
HMSL-10030	KIN001-042		GSK-3 beta
HMSL-10031	KIN001-043		GSK-3 beta
HMSL-10032	Saracatinib	AZD0530	Src
HMSL-10033	KIN001-055		JAK3
HMSL-10034	AS601245	JNK Inhibitor V	JNK3
HMSL-10035	Sigma A6730KIN001-102	AKT inhibitor VIII; Akt1/2 kinase inhibitor	Akt-1
HMSL-10036	SB 239063		MK14
HMSL-10037	AC220		FLT3
HMSL-10038	WH-4-023		LCK
HMSL-10040	R406		SYK
HMSL-10041	BI-2536	NPK33-1-98-1	PLK1
HMSL-10042	Motesanib	AMG706	VGFR1
HMSL-10043	KIN001-127		ITK
HMSL-10045	A443654		Akt-1
HMSL-10046	SB590885		BRAF
HMSL-10047	Pictilisib	Pictrelisib; GDC-0941; RG-7321	PIK3CA
HMSL-10048	PD184352	CI-1040	MP2K1
HMSL-10049	PLX-4720		BRAF
HMSL-10050	AZ-628		BRAF
HMSL-10051	Lapatinib	GW-572016; Tykerb	EGFR
HMSL-10052	Sirolimus	Rapamycin	mTOR
HMSL-10053	ZSTK474		PIK3CA
HMSL-10054	AS605240		PIK3CG
HMSL-10055	BX-912		PDK1
HMSL-10056	Selumetinib	AZD6244; Array142886	MP2K1
HMSL-10057	MK2206		Akt-1
HMSL-10058	CG-930	JNK930	JNK1
HMSL-10059	AZD-6482	KIN001-193	PIK3CB
HMSL-10060	TAK-715		MK14
HMSL-10061	NU7441	KU 57788	DNA-PK
HMSL-10062	GSK1070916	KIN001-216	Aurora kinase B
HMSL-10063	OSI-027
HMSL-10064	WYE-125132		mTOR
HMSL-10065	KIN001-220	Genentech 10	Aurora kinase A
HMSL-10066	MLN8054		Aurora kinase A
HMSL-10067	Barasertib	AZD1152-HQPA	Aurora kinase B
HMSL-10068	Vemurafenib	PLX4032; RG7204; R7204; RO5185426	BRAF
HMSL-10069	Enzastaurin	LY317615	KPCB
HMSL-10070	NPK76-II-72-1		PLK3
HMSL-10071	Palbociclib	PD0332991	CDK4
HMSL-10072	PF562271	KIN001-205	FAK
HMSL-10073	PHA-793887		CDK2
HMSL-10074	KU55933		ATM
HMSL-10075	QL-X-138		BTK
HMSL-10076	QL-XI-92		DDR1
HMSL-10077	QL-XII-47		BTK
HMSL-10078	THZ-2-98-01		IRAK1
HMSL-10079	Torin1		mTOR
HMSL-10080	Torin2		mTOR
HMSL-10081	KIN001-244		PDK1
HMSL-10082	WZ-4-145		CSF1R
HMSL-10083	WZ-7043		CSF1R
HMSL-10084	WZ3105		CLK2
HMSL-10085	WZ4002		EGFR
HMSL-10086	XMD11-50	LRRK2-in-1	LRRK2
HMSL-10087	XMD11-85h		BRSK2
HMSL-10088	XMD13-2		RIPK1
HMSL-10089	XMD14-99		EPHB3
HMSL-10090	XMD15-27		CAMK2B
HMSL-10091	XMD16-144		Aurora kinase A
HMSL-10092	JWE-035		Aurora kinase A
HMSL-10093	XMD8-85		ERK5
HMSL-10094	XMD8-92		ERK5
HMSL-10095	ZG-10		JNK1
HMSL-10096	ZM-447439		Aurora kinase A
HMSL-10097	Erlotinib	OSI-774	EGFR
HMSL-10098	Gefitinib	ZD1839; Iressa	EGFR
HMSL-10099	Nilotinib	AMN-107	ABL1
HMSL-10100	JNK-9L	KIN001-204	JNK1
HMSL-10101	PD0325901	PD-325901	MP2K1
HMSL-10105	MPS-1-IN-1	HG-5-125-01
HMSL-10106	XMD-12
HMSL-10109	YM 201636	Kin001-170	FYV1
HMSL-10110	FR180204	FR 180204; KIN001-230	ERK-1
HMSL-10111	TWS119		GSK-3 beta
HMSL-10112	PF477736		CHK1
HMSL-10113	Kin237	Kin001-237; c-Met/Ron dual kinase inhibitor	c-Met
HMSL-10114	Pazopanib	GW786034; Votrient
HMSL-10115	LDN-193189	DM 3189	ACVR1
HMSL-10116	PF431396		FAK
HMSL-10117	Celastrol		PSB5
HMSL-10118	Amuvatinib	MP470	PGFRA
HMSL-10119	SU11274	PKI-SU11274	c-Met
HMSL-10120	Canertinib	CI-1033; PD-183805	EGFR
HMSL-10121	SB525334		TGFR1
HMSL-10122	NVP-AEW541	AEW541	IGF1R
HMSL-10123	SGX523		c-Met
HMSL-10124	MGCD265		c-Met
HMSL-10125	PHA-665752		c-Met
HMSL-10126	PI103		PIK3CA
HMSL-10127	Dovitinib	TKI_258; TKI258	FLT3
HMSL-10128	GSK 690693		Akt-1
HMSL-10129	Ibrutinib	PCI-32765	BTK
HMSL-10130	Masitinib	AB1010	c-Kit
HMSL-10131	Tivantinib	ARQ197	c-Met
HMSL-10132	SNS-032	BMS-387032	CDK9
HMSL-10133	Afatinib	BIBW-2992	erbB-2
HMSL-10134	GSK1904529A		IGF1R
HMSL-10135	Linsitinib	OSI 906	IGF1R
HMSL-10136	TPCA-1		IKKB
HMSL-10137	BMS509744	BMS-509744	ITK
HMSL-10138	Ruxolitinib		JAK1/2
HMSL-10139	AZD-1480		JAK2
HMSL-10140	Momelotinib	CYT387	JAK1
HMSL-10141	Fedratinib	SAR 302503; SAR-302503; SAR302503; TG 101348; Tg-101348; TG101348	JAK2
HMSL-10142	Trametinib	GSK-1120212; GSK1120212; GSK1120212B; JTP-74057	MP2K1
HMSL-10143	BMS 777607		c-Met
HMSL-10144	Olaparib	AZD2281; KU-0059436	PARP-1
HMSL-10145	Veliparib	ABT-888	PARP-1
HMSL-10146	Omipalisib	GSK2126458; GSK2126458A	PIK3CA
HMSL-10147	Buparlisib	BKM120; NVP-BKM120	PIK3CA
HMSL-10148	XL147	SAR245408	PIK3CA
HMSL-10149	Y39983		ROCK1
HMSL-10150	Ponatinib	AP24534	ABL1
HMSL-10151	Nintedanib	BIBF-1120; Vargatef	VGFR1
HMSL-10152	MK 1775		WEE1hu
HMSL-10153	KIN001-266		M3K8
HMSL-10154	AT7867		Akt-1
HMSL-10155	KU-60019		ATM
HMSL-10156	JNJ38877605		c-Met
HMSL-10157	Foretinib	XL880; GSK1363089	c-Met
HMSL-10158	AZD 5438	KIN001-239	CDK2
HMSL-10159	Pelitinib	EKB-569	EGFR
HMSL-10160	SB 216763		GSK-3 beta
HMSL-10161	Luminespib	NVP-AUY922	HS90A
HMSL-10162	SP600125		JNK1
HMSL-10163	BIX 02189		MP2K5
HMSL-10164	AZD8330	ARRY-424704; ARRY-704	MP2K1
HMSL-10165	PF04217903		c-Met
HMSL-10166	BAY61-3606		SYK
HMSL-10167	SB 203580	RWJ 64809; PB 203580	MK14
HMSL-10168	VX-745		MK14
HMSL-10169	Doramapimod	BIRB 796	MK14
HMSL-10170	JNJ 26854165		p53
HMSL-10171	TGX221		PIK3CB
HMSL-10172	GSK1059615		PIK3CA
HMSL-10173	PI3K-IN-1		mTOR
HMSL-10174	A 769662		AMPK-alpha1
HMSL-10175	Sunitinib	Sutent; SU11248
HMSL-10176	Y-27632		ROCK1
HMSL-10177	Brivanib	BMS-540215	VGFR1
HMSL-10178	OSI-930		c-Kit
HMSL-10179	ABT-737		BCL2
HMSL-10180	CHIR-99021	CT99021; KIN001-157	GSK-3 beta
HMSL-10181	GDC-0879		BRAF
HMSL-10182	Linifanib	ABT-869; AL-39324	FLT3
HMSL-10183	BGJ398	KIN001-271; NVP-BGJ398	FGFR1
HMSL-10184	Rigosertib	ON-01910	PLK1
HMSL-10185	CC-401		JNK1
HMSL-10186	Chelerythrine		KPCB
HMSL-10187	Ki20227		CSF1R
HMSL-10188	BX795		TBK1
HMSL-10189	Bosutinib	SKI-606	Src
HMSL-10190	PIK-93		PIK3CG
HMSL-10191	HMN-214		PLK1
HMSL-10192	KW2449	KW-2449	FLT3
HMSL-10193	Kin236	Tie2 kinase inhibitor	TIE2
HMSL-10194	Cabozantinib	XL-184; BMS-907351	VEGFR-2
HMSL-10195	KIN001-269		CSF1R
HMSL-10196	KIN001-270		CDK9
HMSL-10197	KIN001-260	IKK-2 inhibitor VIII; Bayer IKKb inhibitor	IKKB
HMSL-10198	Vandetanib	ZD6474; Zactima; Caprelsa	VEGFR-2
HMSL-10199	PF 573228		FAK
HMSL-10200	NVP-BHG712	KIN001-265	EPHB4
HMSL-10201	CH5424802		ALK
HMSL-10202	D 4476		TGFR1
HMSL-10203	A66		PIK3CA
HMSL-10204	CAL-101		PIK3CD
HMSL-10205	INK-128	MLN0128	mTOR
HMSL-10206	RAF 265	CHIR-265	BRAF
HMSL-10207	NVP-TAE226		FAK
HMSL-10208	JNK-IN-5A	TCS JNK 5a; KIN001-188	MK09
